# Supplementary material for: NiPd co-doped nitrogen-coordinated graphene as a high-efficiency electrocatalyst for oxygen reduction reactions: a first-principles determination
Source: Royal Society of Chemistry journal article supplement (doi:10.1039/d3cp00574g), 2023-01-01
Supplement: d3cp00574g1.pdf [file d3cp00574g1.pdf]

# **NiPd co-doped nitrogen-coordinated graphene as a high-efficiency electrocatalyst for oxygen reduction reaction: A first-principles determination**

Kaiwen Huang,<sup>a</sup> Weihua Yang,<sup>a</sup> Lei Li,<sup>\*b</sup> Yameng Li,<sup>a</sup> Rao Huang,<sup>a</sup> Yuhua Wen <sup>\*a</sup>

<sup>a</sup> *Department of Physics, Xiamen University, Xiamen 361005, China. E-mail: yhw@xmu.edu.cn*

<sup>b</sup> *College of Physics and Electronic Information, Inner Mongolia Normal University, Hohhot 010022, China. E-mail: lilei@imnu.edu.cn*

**Table S1** The Metal-N bond lengths ( $d_{M-N}$ ), the Ni-Pd bond lengths ( $d_{Ni-Pd}$ ) and charges of each atom using different supercell sizes.

|                         | 5×5               | 10×5              |
|-------------------------|-------------------|-------------------|
| $d_{Ni-N}(\text{\AA})$  | 1.848/1.841/1.950 | 1.848/1.840/1.950 |
| $d_{Pd-N}(\text{\AA})$  | 1.924/1.998/2.003 | 1.924/1.998/2.003 |
| $d_{Ni-Pd}(\text{\AA})$ | 2.241             | 2.241             |
| Charge_Ni               | -0.63             | -0.63             |
| Charge_Pd               | -0.41             | -0.41             |
| Charge_T <sub>3</sub>   | 0.60              | 0.60              |
| Charge_T <sub>4</sub>   | 1.20              | 1.20              |
| Charge_T <sub>5</sub>   | 1.09              | 1.09              |
| Charge_T <sub>6</sub>   | 1.07              | 1.07              |
| Charge_T <sub>7</sub>   | 1.30              | 1.30              |
| Charge_T <sub>8</sub>   | 0.71              | 0.71              |
| after O adsorption      |                   |                   |
| Charge_O                | 0.79              | 0.79              |
| Charge_Ni               | -0.91             | -0.91             |
| Charge_Pd               |                   |                   |
| Charge_T <sub>3</sub>   | 0.61              | 0.61              |
| Charge_T <sub>4</sub>   | 1.21              | 1.21              |
| Charge_T <sub>5</sub>   | 1.06              | 1.06              |
| Charge_T <sub>6</sub>   | 0.66              | 0.66              |
| Charge_T <sub>7</sub>   | 1.14              | 1.14              |
| Charge_T <sub>8</sub>   | 0.61              | 0.61              |

**Table S2** The Metal-N bond lengths ( $d_{M-N}$ ) vs. sum of covalent radii ( $r_M + r_N$ ) of the metal and N atoms, and the Ni-Pd bond lengths ( $d_{Ni-Pd}$ ) vs. sum of covalent radii ( $r_{Ni} + r_{Pd}$ ) of Ni and Pd atoms.

| Model                 | $d_{Ni-N}(\text{\AA})$ | $r_{Ni} + r_N(\text{\AA})$ | $d_{Pd-N}(\text{\AA})$ | $r_{Pd} + r_N(\text{\AA})$ | $d_{Ni-Pd}(\text{\AA})$ | $r_{Ni} + r_{Pd}(\text{\AA})$ |
|-----------------------|------------------------|----------------------------|------------------------|----------------------------|-------------------------|-------------------------------|
| NiPdN <sub>6</sub> -G | 1.88                   | 1.95                       | 1.98                   | 2.10                       | 2.24                    | 2.63                          |
| NiN <sub>4</sub> -G   | 1.88                   | 1.95                       |                        |                            |                         |                               |
| PdN <sub>4</sub> -G   |                        |                            | 1.95                   | 2.10                       |                         |                               |

**Table S3** The formation energies ( $E_{f1}$  and  $E_{f2}$ ), standard dissolution potential standard dissolution potential ( $U_{diss}^0$ ), number of transferred electrons ( $N_e$ ) during the dissolution, dissolution potential ( $U_{diss}$ ), the binding energies ( $E_b$ ) and the cohesive energy ( $E_{coh}$ ) for each catalyst.

| Model                 | $E_{f1}(\text{eV})$ | $E_{f2}(\text{eV})$ |                     | $U_{diss}^0(\text{V})$ |      | $N_e$ |    | $U_{diss}(\text{V})$ |      | $E_b(\text{eV})$ | $E_{coh}(\text{eV})$ |
|-----------------------|---------------------|---------------------|---------------------|------------------------|------|-------|----|----------------------|------|------------------|----------------------|
|                       |                     | Ni-PdN <sub>6</sub> | Pd-NiN <sub>6</sub> | Ni                     | Pd   | Ni    | Pd | Ni                   | Pd   |                  |                      |
| NiPdN <sub>6</sub> -G | -5.46               | -6.12               | -4.51               | -0.26                  | 0.95 | 2     | 2  | 2.80                 | 3.21 | -5.65            | -5.19                |
| NiN <sub>4</sub> -G   | -4.45               |                     |                     | -0.26                  |      | 2     |    | 1.97                 |      | -8.21            | -5.84                |
| PdN <sub>4</sub> -G   | -2.33               |                     |                     | 0.95                   |      | 2     |    | 2.12                 |      | -7.02            | -4.54                |

**Table S4** The free-energy ( $\Delta G$ ) for the different reaction intermediates and the overpotential ( $\eta$ ) for all possible ORR pathways on NiPdN<sub>6</sub>-G.

| Path | Process                                                                           | $\Delta G$ (eV) |      |        |         |      |      | $\eta$ (V) |
|------|-----------------------------------------------------------------------------------|-----------------|------|--------|---------|------|------|------------|
|      |                                                                                   | *O <sub>2</sub> | *OOH | *O+*OH | *OH+*OH | *O   | *OH  |            |
| 1    | 1→2 <sub>i</sub> (B)→3(up)→4(up)                                                  | 4.36            | 4.06 |        |         | 1.83 | 1.00 | 0.40       |
| 2    | 1→2 <sub>i</sub> (B)→3(down)→4(down)                                              | 4.36            | 4.06 |        |         | 1.83 | 0.98 | 0.38       |
| 3    | 1→0(T <sub>2</sub> )→2 <sub>ii</sub> (T <sub>2</sub> )→3(up)→4(up)                | 4.36            | 4.06 | 3.83   |         | 1.83 | 1.00 | 0.40       |
| 4    | 1→0(T <sub>2</sub> )→2 <sub>ii</sub> (T <sub>2</sub> )→3(down)→4(down)            | 4.36            | 4.06 | 3.83   |         | 1.83 | 0.98 | 0.38       |
| 5    | 1→0(T <sub>2</sub> )→2 <sub>ii</sub> '(T <sub>2</sub> )→3'(T <sub>2</sub> )→4(up) | 4.36            | 4.06 | 3.83   | 2.71    |      | 1.00 | 0.37       |
| 6    | 1→2 <sub>iii</sub> (T <sub>2</sub> )→3'(T <sub>2</sub> )→4(up)                    | 4.36            | 4.06 |        | 2.71    |      | 1.00 | 0.37       |
| 7    | 1→0(T <sub>3</sub> )→2 <sub>ii</sub> (T <sub>3</sub> )→3(up)→4(up)                | 4.36            | 4.06 | 4.24   |         | 1.83 | 1.00 | 0.40       |
| 8    | 1→0(T <sub>3</sub> )→2 <sub>ii</sub> (T <sub>3</sub> )→3(down)→4(down)            | 4.36            | 4.06 | 4.24   |         | 1.83 | 0.98 | 0.38       |
| 9    | 1→0(T <sub>3</sub> )→2 <sub>ii</sub> '(T <sub>3</sub> )→3'(T <sub>3</sub> )→4(up) | 4.36            | 4.06 | 4.24   | 3.30    |      | 0.98 | 0.37       |
| 10   | 1→2 <sub>iii</sub> (T <sub>3</sub> )→3'(T <sub>3</sub> )→4(up)                    | 4.36            | 4.06 |        | 3.30    |      | 0.98 | 0.47       |
| 11   | 1→0(T <sub>8</sub> )→2 <sub>ii</sub> (T <sub>8</sub> )→3(up)→4(up)                | 4.36            | 4.06 | 4.22   |         | 1.83 | 1.00 | 0.40       |
| 12   | 1→0(T <sub>8</sub> )→2 <sub>ii</sub> (T <sub>8</sub> )→3(down)→4(down)            | 4.36            | 4.06 | 4.22   |         | 1.83 | 0.98 | 0.38       |
| 13   | 1→0(T <sub>8</sub> )→2 <sub>ii</sub> '(T <sub>8</sub> )→3'(T <sub>8</sub> )→4(up) | 4.36            | 4.06 | 4.22   | 3.37    |      | 0.98 | 0.38       |
| 14   | 1→2 <sub>iii</sub> (T <sub>8</sub> )→3'(T <sub>8</sub> )→4(up)                    | 4.36            | 4.06 |        | 3.37    |      | 0.98 | 0.54       |

**Table S5** The total energy ( $\Delta E$ ), the changes of the zero-point energy ( $\Delta ZPE$ ), the temperature T and the changes of entropy ( $\Delta S$ ) of each system calculated by DFT in free-energy ( $\Delta G$ ) calculation.

|                             | $\Delta E$ | $\Delta ZPE - T\Delta S$ | $\Delta G (U=0)$ |
|-----------------------------|------------|--------------------------|------------------|
| *O <sub>2</sub>             | -440.158   | 0.003                    | 4.36             |
| *OOH                        | -444.211   | 0.341                    | 4.06             |
| *O(B)+*OH(T <sub>2</sub> )  | -444.298   | 0.204                    | 3.83             |
| *O(B)+*OH*(T <sub>3</sub> ) | -444.121   | 0.431                    | 4.24             |
| *O(B)+*OH(T <sub>8</sub> )  | -444.136   | 0.434                    | 4.22             |
| *OH(B)+*OH(T <sub>2</sub> ) | -449.260   | 0.641                    | 2.71             |
| *OH(B)+*OH(T <sub>3</sub> ) | -448.699   | 0.667                    | 3.30             |
| *OH(B)+*OH(T <sub>8</sub> ) | -448.668   | 0.707                    | 3.37             |
| *O                          | -435.348   | 0.071                    | 1.83             |
| *OH (up)                    | -439.852   | 0.334                    | 1.00             |
| *OH (down)                  | -439.988   | 0.460                    | 0.98             |

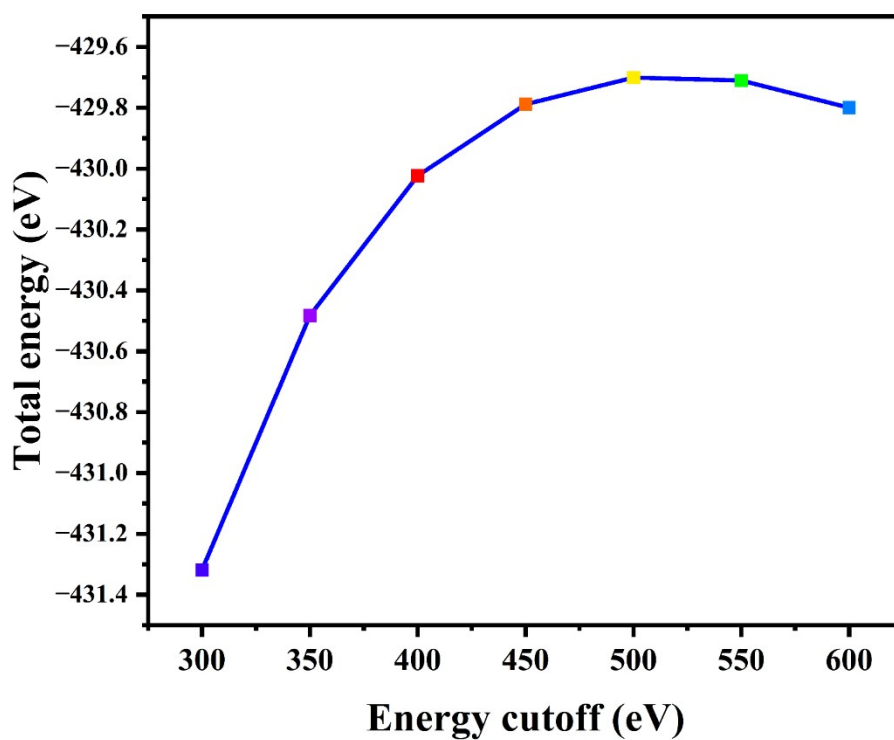

**Fig. S1** Calculated total energies of NiPdN<sub>6</sub>-G using different energy cutoff values.

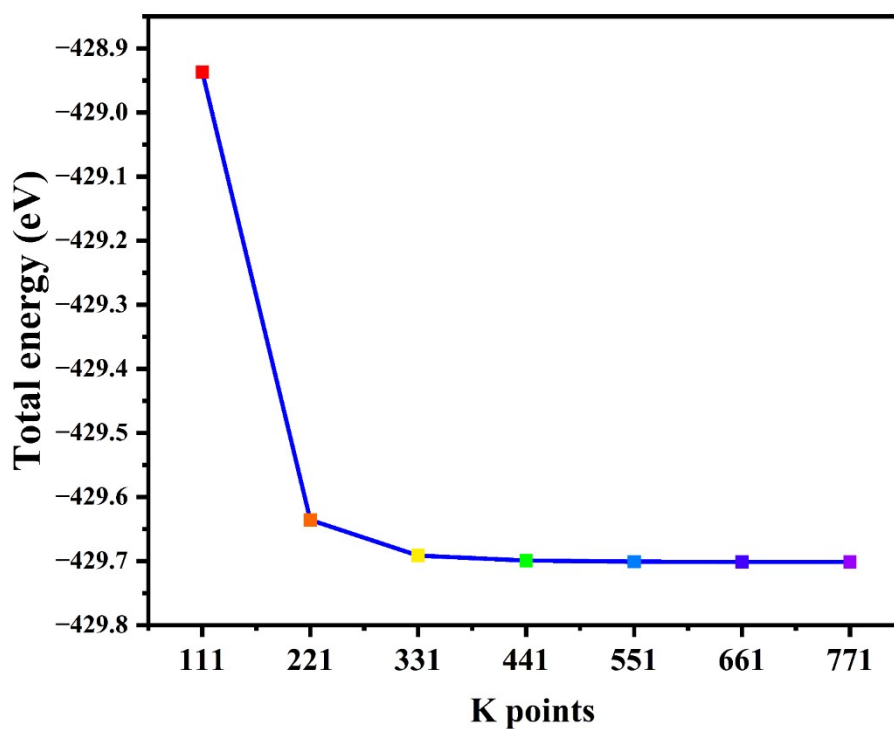

**Fig. S2** Calculated total energies of NiPdN<sub>6</sub>-G using different *k*-point meshes.

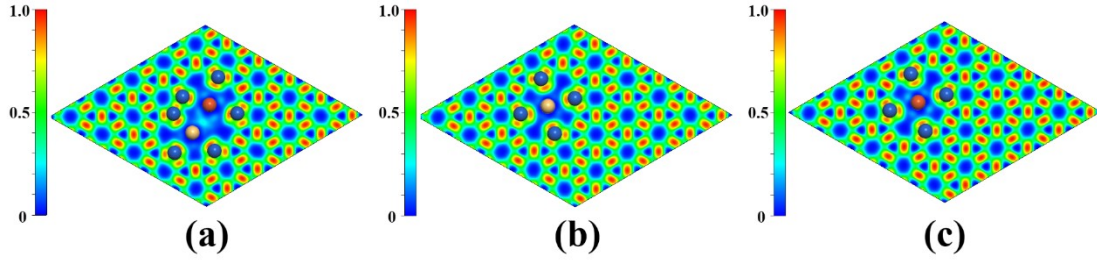

**Fig. S3** The electron location functions (ELFs) for (a) NiPdN<sub>6</sub>-G, (b) NiN<sub>4</sub>-G and (c) PdN<sub>4</sub>-G. Blue, yellow and orange spheres represent N, Ni and Pd atoms, respectively. Scale bar: ELF = 0, 0.5, and 1, corresponding to no electron (blue), the electron gas (green), and perfect electron (red), respectively.

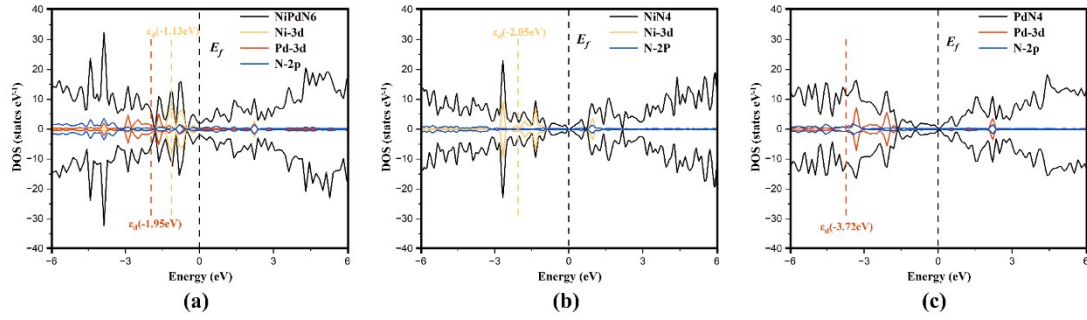

**Fig. S4** Total DOS, projected Ni-3*d*, Pd-3*d* and N-2*p* states, and the metal *d*-band centers ( $\epsilon_d$ ) calculated from both spin up and spin down states of (a) NiPdN<sub>6</sub>-G, (b) NiN<sub>4</sub>-G and (c) PdN<sub>4</sub>-G. Fermi level is set at 0 eV.

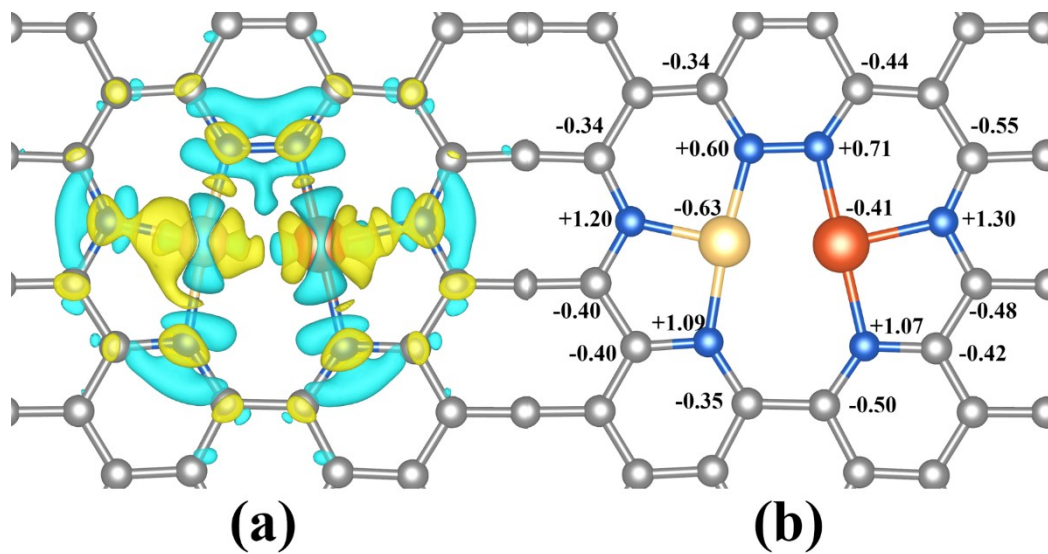

**Fig. S5** (a) The charge density difference plot and (b) calculated Bader charges for

NiPdN<sub>6</sub>-G catalyst. Yellow and cyan bubbles indicate electron accumulation and depletion, respectively. Blue, yellow and orange spheres represent N, Ni and Pd atoms, respectively. The '+' and '-' denote the gained and lost charges, respectively.

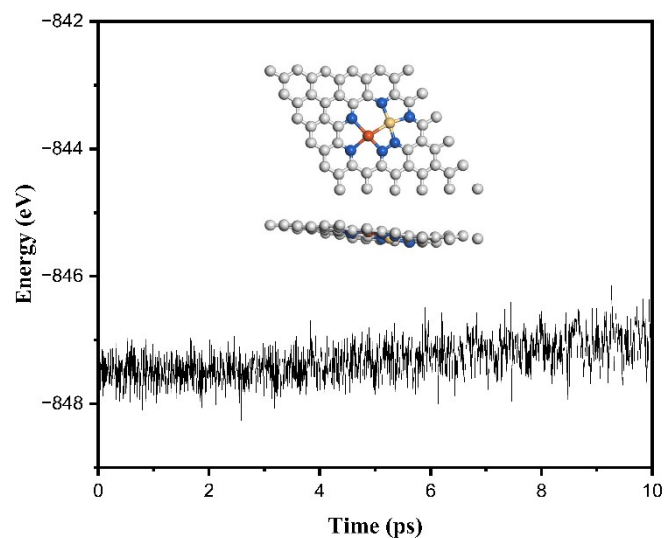

**Fig. S6** The energy curve of NiPdN<sub>6</sub> structure is simulated *via* AIMD at 500 K, and the top-view and side-view of NiPdN<sub>6</sub> structure are both obtained at 10 ps.

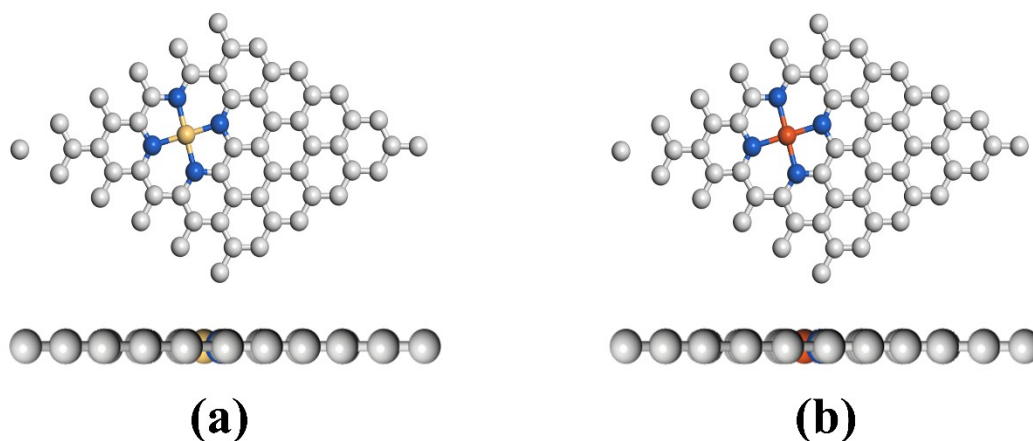

**Fig. S7** The optimized structures of (a) NiN<sub>4</sub>-G and (b) PdN<sub>4</sub>-G. Grey, blue, yellow and orange spheres represent C, N, Ni and Pd atoms, respectively.

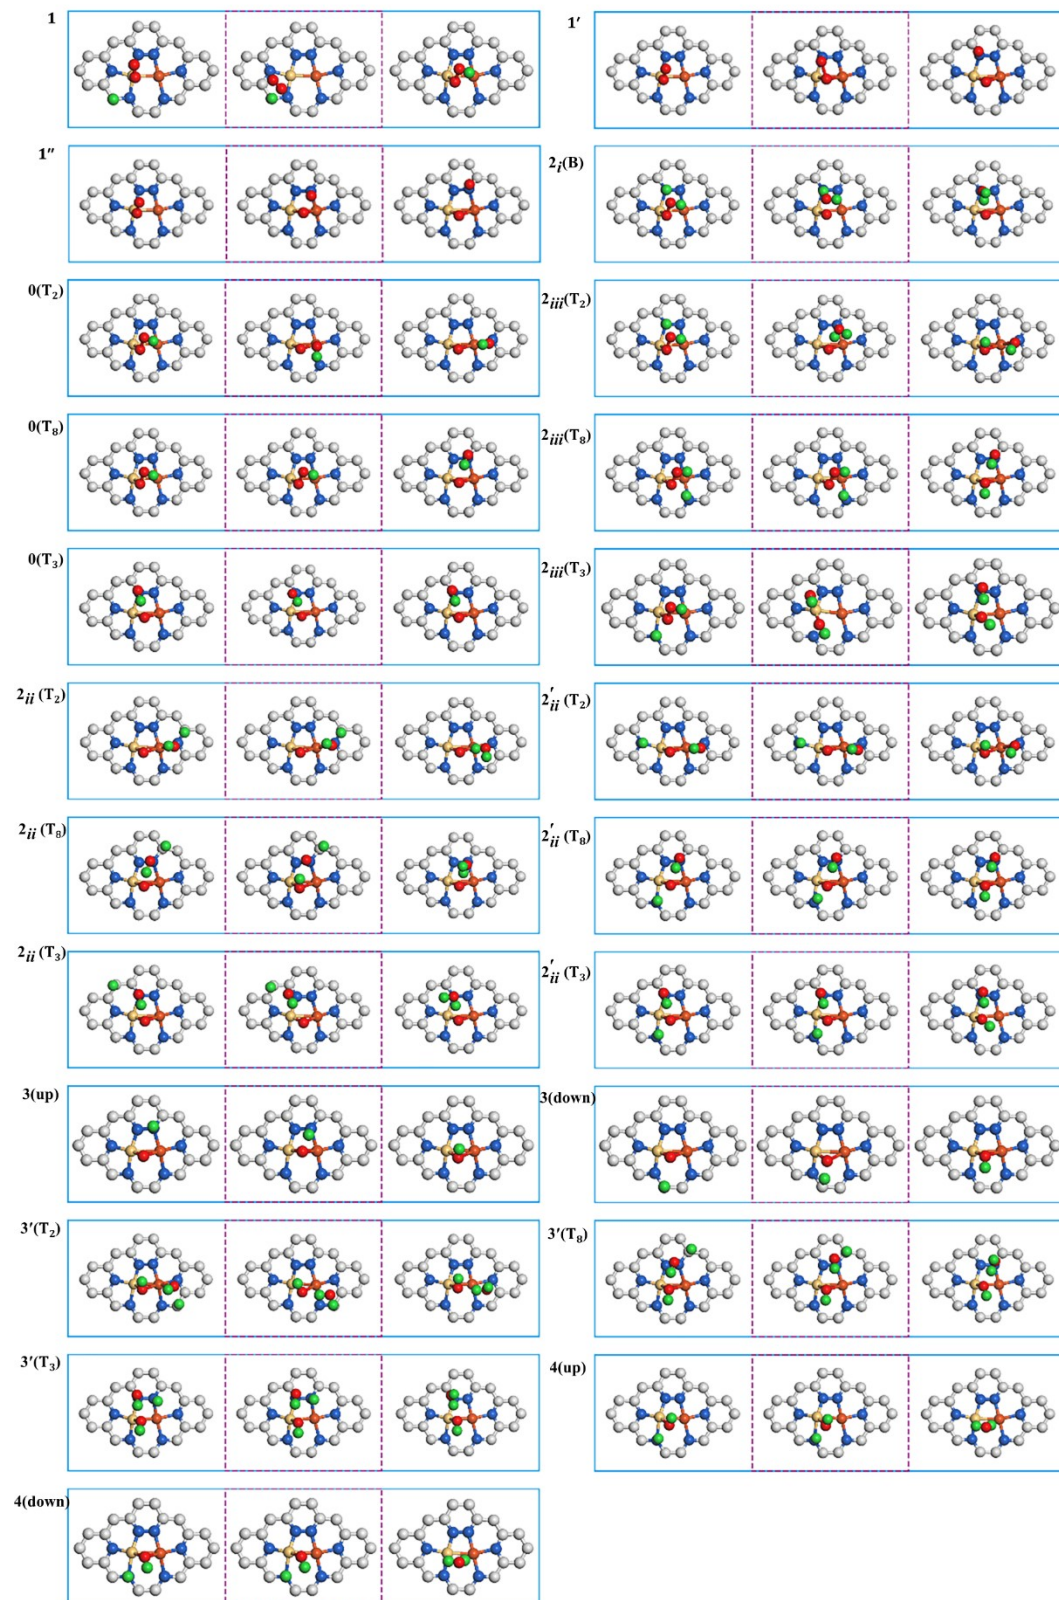

**Fig. S8** Atomic structures of IS, TS, and FS for each step of ORR on NiPdN<sub>6</sub>-G. The TS structures are marked by dashed boxes. Grey, blue, yellow, orange, red and green spheres represent C, N, Ni, Pd, O and H atoms, respectively.

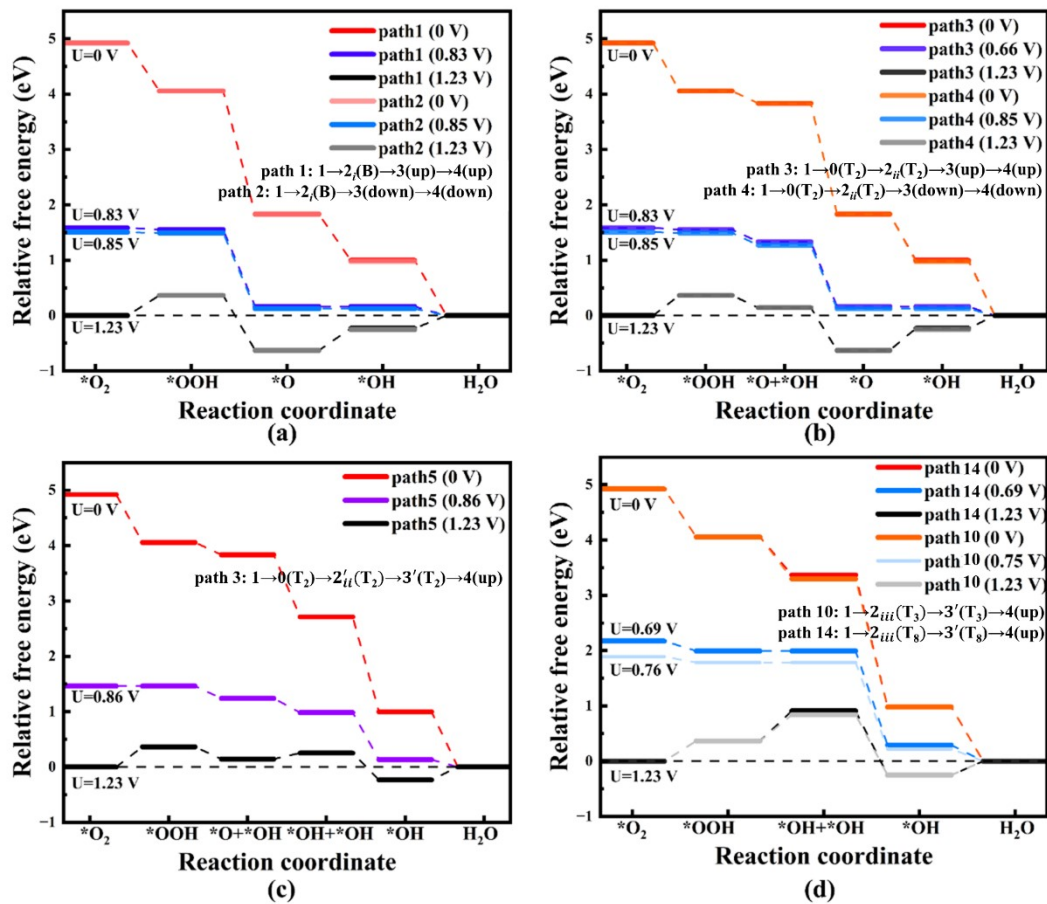

**Fig. S9** Free-energy diagrams for ORR on NiPdN<sub>6</sub>-G in (a) paths 1 and 2; (b) paths 3 and 4; (c) path 5; (d) paths 10 and 14.

The formation energy ( $E_{f1}$ ) for evaluating the structural stability, was calculated by the following equation

$$E_{f1} = E_{\text{NiPdN}_6\text{-G}} - E_{\text{Ni}} - E_{\text{Pd}} - 6\mu_{\text{N}} - 40\mu_{\text{C}} \quad \text{MERGEFORMAT} \quad (\text{S1})$$

or

$$E_{f1} = E_{\text{MN}_4\text{-G}} - E_{\text{M}} - 4\mu_{\text{N}} - 44\mu_{\text{C}} \quad \text{MERGEFORMAT} \quad (\text{S2})$$

Where  $E_{\text{NiPdN}_6\text{-G}}$  is the total energy of NiPdN<sub>6</sub>-G DAC, while  $E_{\text{MN}_4\text{-G}}$  is the total energy of NiN<sub>4</sub>-G or PdN<sub>4</sub>-G SAC.  $E_{\text{Ni}}$  and  $E_{\text{Pd}}$  are the energies of isolated Ni and Pd atoms in vacuum, and  $E_{\text{M}}$  takes above value as appropriate. The chemicalpotentials of C and N atoms are denoted as  $\mu_{\text{C}}$  and  $\mu_{\text{N}}$ , which are derived from nitrogen gas and pristine graphene.

Besides  $E_{f1}$ , the formation energy ( $E_{f2}$ ) was also calculated to evaluate the thermodynamic for NiPdN<sub>6</sub>-G, as following equation

$$E_{f2} = E_{\text{NiPdN}_6\text{-G}} - E_{\text{PdN}_6\text{-G}} - E_{\text{Ni}} \quad \text{MERGEFORMAT} \quad (\text{S3})$$

and

$$E_{f2} = E_{\text{NiPdN}_6\text{-G}} - E_{\text{NiN}_6\text{-G}} - E_{\text{Pd}} \quad \text{MERGEFORMAT} \quad (\text{S4})$$

where  $E_{f2\text{-Ni}}$  and  $E_{f2\text{-Pd}}$  are the total energy of single Ni or Pd atom doped N-coordinated graphene.

The dissolution potential ( $U_{\text{diss}}$ ) were also used to evaluate the electrochemical stabilities using the follow equation

$$U_{\text{diss}} = U_{\text{diss}}^0(\text{metal}, \text{bulk}) - \frac{E_{f2}}{eN_e} \quad \text{MERGEFORMAT} \quad (\text{S5})$$

Where  $U_{\text{diss}}^0(\text{metal}, \text{bulk})$  is the standard dissolution potential of bulk metal,  $N_e$  is the number of electrons during the dissolution, respectively.

The binding energy ( $E_b$ ) between two metal atoms and substrate, and the cohesive energy ( $E_{\text{coh}}$ ) were calculated respectively using the following equations

$$E_b = \frac{E_{\text{NiPdN}_6\text{-G}} - E_{\text{Ni}} - E_{\text{Pd}} - E_{\text{N}_6\text{-G}}}{2} \quad \text{MERGEFORMAT} \quad (\text{S6})$$

$$E_b = E_{\text{MN}_6\text{-G}} - E_{\text{M}} - E_{\text{N}_6\text{-G}} \quad \backslash * \text{MERGEFORMAT (S7)}$$

and

$$E_{\text{coh}} = \frac{E_{\text{Ni(bulk)}} + E_{\text{Pd(bulk)}} - E_{\text{Ni}} - E_{\text{Pd}}}{2} \quad \backslash * \text{MERGEFORMAT (S8)}$$

$$E_{\text{coh}} = E_{\text{M(bulk)}} - E_{\text{M}} \quad \backslash * \text{MERGEFORMAT (S9)}$$

The charge density difference plots were calculated using the following equation:

$$\Delta\rho(r) = \rho(r)_{\text{NiPdN}_6\text{-G}} - \rho(r)_{\text{Ni+Pd}} - \rho(r)_{\text{N}_6\text{-G}}$$

where  $\rho(r)_{\text{NiPdN}_6\text{-G}}$  is the charge density of NiPdN<sub>6</sub>-G catalyst.  $\rho(r)_{\text{Ni+Pd}}$  is the charge densities of Ni and Pd atoms.  $\rho(r)_{\text{N}_6\text{-G}}$  is the charge density of the N-doped graphene.

## References

1. W. Chen, J. Huang, J. Wei, D. Zhou, J. Cai, Z. D. He and Y. X. Chen, *Electrochem. Commun.*, 2018, **96**, 71-76.
2. H. A. Gasteiger, S. S. Kocha, B. Sompalli and F. T. Wagner, *Appl. Catal., B*, 2005, **56**, 9-35.
